# Supplementary material
Source: ML conference proceedings conference paper supplement (https://proceedings.mlr.press/v97/yuan19a.html)
Supplement: Supplementary file [file yuan19a-supp.pdf]

---

## Supplementary material: Online Adaptive Principal Component Analysis and Its extensions

---

The supplementary material contains proofs of the main results of the paper along with supporting results.

Before presenting the proofs, we need the following lemma from previous literature:

**Lemma 4.** (*Freund & Schapire, 1997*) Suppose  $0 \leq L \leq \tilde{L}$  and  $0 < R \leq \tilde{R}$ . Let  $\beta = g(\tilde{L}/\tilde{R})$  where  $g(z) = 1/(1 + \sqrt{2/z})$ . Then

$$\frac{-L \ln \beta + R}{1 - \beta} \leq L + \sqrt{2\tilde{L}\tilde{R}} + R$$

Additionally, we need the following classic bound on traces for postive semidefinite matrices. See, e.g. (Tsuda et al., 2005).

**Lemma 5.** For any positive semi-definite matrix  $A$  and any symmetric matrices  $B$  and  $C$ ,  $B \preceq C$  implies  $\text{Tr}(AB) \leq \text{Tr}(AC)$ .

### A. Proof of Theorem 1

*Proof.* Fix  $1 \leq r \leq s \leq T$ . We set  $\mathbf{q}_t = \mathbf{q} \in \mathcal{B}_{n-k}^n$  for  $t = r, \dots, s$  and 0 elsewhere. Thus, we have that  $\|\mathbf{q}_t\|_1$  is either 0 or 1.

According to Lemma 1, for both cases of  $\mathbf{q}_t$ , we have

$$\|\mathbf{q}_t\|_1 \mathbf{w}_t^T \ell_t (1 - \exp(-\eta)) - \eta \mathbf{q}_t^T \ell_t \leq \sum_{i=1}^n q_{t,i} \ln \left( \frac{v_{t+1,i}}{\hat{w}_{t,i}} \right) \quad (32)$$

The analysis for  $\sum_{i=1}^n q_{t,i} \ln \left( \frac{v_{t+1,i}}{\hat{w}_{t,i}} \right)$  follows the Proof of Proposition 2 in (Cesa-Bianchi et al., 2012b). We describe the steps for completeness, since it is helpful for understanding the effect of the fixed-share step, Eq.(4b). This analysis will be crucial for the understanding how the fixed-share step can be applied to PCA problems.

$$\begin{aligned} \sum_{i=1}^n q_{t,i} \ln \left( \frac{v_{t+1,i}}{\hat{w}_{t,i}} \right) &= \underbrace{\sum_{i=1}^n \left( q_{t,i} \ln \frac{1}{\hat{w}_{t,i}} - q_{t-1,i} \ln \frac{1}{v_{t,i}} \right)}_A \\ &\quad + \underbrace{\sum_{i=1}^n \left( q_{t-1,i} \ln \frac{1}{v_{t,i}} - q_{t,i} \ln \frac{1}{v_{t+1,i}} \right)}_B \end{aligned} \quad (33)$$

For the expression of  $A$ , we have

$$\begin{aligned} A &= \sum_{i:q_{t,i} \geq q_{t-1,i}} \left( (q_{t,i} - q_{t-1,i}) \ln \frac{1}{\hat{w}_{t,i}} + q_{t-1,i} \ln \frac{v_{t,i}}{\hat{w}_{t,i}} \right) \\ &\quad + \sum_{i:q_{t,i} < q_{t-1,i}} \underbrace{\left( (q_{t,i} - q_{t-1,i}) \ln \frac{1}{v_{t,i}} + q_{t,i} \ln \frac{v_{t,i}}{\hat{w}_{t,i}} \right)}_{\leq 0} \end{aligned} \quad (34)$$

Based on the update in Eq.(4), we have  $1/\hat{w}_{t,i} \leq n/\alpha$  and  $v_{t,i}/\hat{w}_{t,i} \leq 1/(1-\alpha)$ . Plugging the bounds into the above equation, we have

$$\begin{aligned} A &\leq \underbrace{\sum_{i:q_{t,i} \geq q_{t-1,i}} (q_{t,i} - q_{t-1,i}) \ln \frac{n}{\alpha}}_{=D_{TV}(\mathbf{q}_t, \mathbf{q}_{t-1})} \\ &\quad + \underbrace{\left( \sum_{i:q_{t,i} \geq q_{t-1,i}} q_{t-1,i} + \sum_{i:q_{t,i} < q_{t-1,i}} q_{t,i} \right) \ln \frac{1}{1-\alpha}}_{=\|\mathbf{q}_t\|_1 - D_{TV}(\mathbf{q}_t, \mathbf{q}_{t-1})} \end{aligned} \quad (35)$$

Telescoping the expression of  $B$ , substituting the above inequality in Eq.(33), and summing over  $t = 2, \dots, T$ , we have

$$\begin{aligned} \sum_{t=2}^T \sum_{i=1}^n q_{t,i} \ln \frac{v_{t+1,i}}{\hat{w}_{t,i}} &\leq m(\mathbf{q}_{1:T}) \ln \frac{n}{\alpha} + \\ &\quad \left( \sum_{t=2}^T \|\mathbf{q}_t\|_1 - m(\mathbf{q}_{1:T}) \right) \ln \frac{1}{1-\alpha} + \sum_{i=1}^n q_{1,i} \ln \frac{1}{v_{2,i}} \end{aligned} \quad (36)$$

Adding the  $t = 1$  term to the above inequality, we have

$$\begin{aligned} \sum_{t=1}^T \sum_{i=1}^n q_{t,i} \ln \frac{v_{t+1,i}}{\hat{w}_{t,i}} &\leq \|\mathbf{q}_1\|_1 \ln(n) + m(\mathbf{q}_{1:T}) \ln \frac{n}{\alpha} \\ &\quad + \left( \sum_{t=1}^T \|\mathbf{q}_t\|_1 - m(\mathbf{q}_{1:T}) \right) \ln \frac{1}{1-\alpha} \end{aligned} \quad (37)$$

Now we bound the right side, using the choices for  $\mathbf{q}_t$  described at the beginning of the proof. If  $r \geq 2$ ,  $m(\mathbf{q}_{1:T}) = 1$ , and  $\|\mathbf{q}_1\|_1 = 0$ . If  $r = 1$ ,  $m(\mathbf{q}_{1:T}) = 0$ , and  $\|\mathbf{q}_1\|_1 = 1$ . Thus,  $m(\mathbf{q}_{1:T}) + \|\mathbf{q}_1\|_1 = 1$ , and the right part can be upper bounded by  $\ln \frac{n}{\alpha} + T \ln \frac{1}{1-\alpha}$ .

Combine the above inequality with Eq.(32), set  $\mathbf{q}_t = \mathbf{q} \in \mathcal{B}_{n-k}^n$  for  $t = r, \dots, s$  and 0 elsewhere, and multiply both

sides by  $n - k$ , we have

$$(1 - \exp(-\eta)) \sum_{t=r}^s (n-k) \mathbf{w}_t^T \ell_t - \eta \sum_{t=r}^s (n-k) \mathbf{q}^T \ell_t \leq (n-k) \ln \frac{n}{\alpha} + (n-k) T \ln \frac{1}{1-\alpha} \quad (38)$$

If we set  $\alpha = 1/(1 + (n-k)T)$ , then the right part can be upper bounded by  $(n-k) \ln(n(1 + (n-k)T)) + 1$ , which equals to  $D$  as defined in the Theorem 1. Thus, the above inequality can be reformulated as

$$\sum_{t=r}^s (n-k) \mathbf{w}_t^T \ell_t \leq \frac{\eta \sum_{t=r}^s (n-k) \mathbf{q}^T \ell_t + D}{1 - \exp(-\eta)} \quad (39)$$

Since the above inequality holds for arbitrary  $\mathbf{q} \in \mathcal{B}_{n-k}^n$ , we have

$$\sum_{t=r}^s (n-k) \mathbf{w}_t^T \ell_t \leq \frac{\eta \min_{\mathbf{q} \in \mathcal{B}_{n-k}^n} \sum_{t=r}^s (n-k) \mathbf{q}^T \ell_t + D}{1 - \exp(-\eta)} \quad (40)$$

We will apply the inequality in Lemma 4 to upper bound the right part in Eq.(40). With  $\min_{\mathbf{q} \in \mathcal{B}_{n-k}^n} \sum_{t=r}^s (n-k) \mathbf{q}^T \ell_t \leq L$  and  $\eta = \ln(1 + \sqrt{2D/L})$ , we have

$$\sum_{t=r}^s (n-k) \mathbf{w}_t^T \ell_t - \min_{\mathbf{q} \in \mathcal{B}_{n-k}^n} \sum_{t=r}^s (n-k) \mathbf{q}^T \ell_t \leq \sqrt{2LD} + D \quad (41)$$

Since the above inequality always holds for all intervals,  $[r, s]$ , the result is proved by maximizing the left side over  $[r, s]$ .  $\square$

## B. Proof of Theorem 3

*Proof.* In the proof, we will use two cases of  $Q_t$ :  $Q_t \in \mathcal{B}_{n-k}^n$ , and  $Q_t = 0$ .

We first apply the eigendecomposition to  $Q_t$  as  $Q_t = \tilde{D} \text{diag}(\mathbf{q}_t) \tilde{D}^T$ , where  $\tilde{D} = [\tilde{\mathbf{d}}_1, \dots, \tilde{\mathbf{d}}_n]$ . Since in the adaptive setting,  $Q_{t-1}$  is either equal to  $Q_t$  or 0, they share the same eigenvectors and  $Q_{t-1}$  can be expressed as  $Q_{t-1} = \tilde{D} \text{diag}(\mathbf{q}_{t-1}) \tilde{D}^T$ .

According to Lemma 2, the following inequality is true for both cases of  $Q_t$ :

$$\|\mathbf{q}_t\|_1 \text{Tr}(W_t \mathbf{x}_t \mathbf{x}_t^T) (1 - \exp(-\eta)) - \eta \text{Tr}(Q_t \mathbf{x}_t \mathbf{x}_t^T) \leq -\text{Tr}(Q_t \ln \widehat{W}_t) + \text{Tr}(Q_t \ln V_{t+1}) \quad (42)$$

The next steps extend proof of Proposition 2 in (Cesa-Bianchi et al., 2012b) to the matrix case.

We analyze the right part of the above inequality, which can be expressed as:

$$-\text{Tr}(Q_t \ln \widehat{W}_t) + \text{Tr}(Q_t \ln V_{t+1}) = \bar{A} + \bar{B} \quad (43)$$

where  $\bar{A} = -\text{Tr}(Q_t \ln \widehat{W}_t) + \text{Tr}(Q_{t-1} \ln V_t)$ , and  $\bar{B} = -\text{Tr}(Q_{t-1} \ln V_t) + \text{Tr}(Q_t \ln V_{t+1})$ .

We will first upper bound the  $\bar{A}$  term, and then telescope the  $\bar{B}$  term.

$\bar{A}$  can be expressed as:

$$\begin{aligned} \bar{A} = & \sum_{i: q_{t,i} \geq q_{t-1,i}} \left( \underbrace{-\text{Tr}((q_{t,i} \tilde{\mathbf{d}}_i \tilde{\mathbf{d}}_i^T - q_{t-1,i} \tilde{\mathbf{d}}_i \tilde{\mathbf{d}}_i^T) \ln \widehat{W}_t)}_{\textcircled{1}} \right) \\ & + \underbrace{\text{Tr}(q_{t-1,i} \tilde{\mathbf{d}}_i \tilde{\mathbf{d}}_i^T \ln V_t) - \text{Tr}(q_{t-1,i} \tilde{\mathbf{d}}_i \tilde{\mathbf{d}}_i^T \ln \widehat{W}_t)}_{\textcircled{2}} \\ & + \sum_{i: q_{t,i} < q_{t-1,i}} \left( \underbrace{-\text{Tr}((q_{t,i} \tilde{\mathbf{d}}_i \tilde{\mathbf{d}}_i^T - q_{t-1,i} \tilde{\mathbf{d}}_i \tilde{\mathbf{d}}_i^T) \ln V_t)}_{\textcircled{3}} \right) \\ & + \underbrace{\text{Tr}(q_{t,i} \tilde{\mathbf{d}}_i \tilde{\mathbf{d}}_i^T \ln V_t) - \text{Tr}(q_{t,i} \tilde{\mathbf{d}}_i \tilde{\mathbf{d}}_i^T \ln \widehat{W}_t)}_{\textcircled{4}} \end{aligned} \quad (44)$$

For  $\textcircled{1}$ , it can be expressed as:

$$\begin{aligned} \textcircled{1} & = \text{Tr}((q_{t,i} \tilde{\mathbf{d}}_i \tilde{\mathbf{d}}_i^T - q_{t-1,i} \tilde{\mathbf{d}}_i \tilde{\mathbf{d}}_i^T) \ln \widehat{W}_t^{-1}) \\ & \leq \text{Tr}((q_{t,i} \tilde{\mathbf{d}}_i \tilde{\mathbf{d}}_i^T - q_{t-1,i} \tilde{\mathbf{d}}_i \tilde{\mathbf{d}}_i^T) \ln \frac{n}{\alpha}) \\ & = (q_{t,i} - q_{t-1,i}) \ln \frac{n}{\alpha}. \end{aligned} \quad (45)$$

The inequality holds because the update in Eq.(14b) implies  $\ln \widehat{W}_t^{-1} \preceq I \ln \frac{n}{\alpha}$  and furthermore,  $(q_{t,i} \tilde{\mathbf{d}}_i \tilde{\mathbf{d}}_i^T - q_{t-1,i} \tilde{\mathbf{d}}_i \tilde{\mathbf{d}}_i^T)$  is positive semi-definite. Thus, Lemma 5, gives the result.

The expression for  $\textcircled{2}$  can be bounded as

$$\begin{aligned} \textcircled{2} & = \text{Tr}(q_{t-1,i} \tilde{\mathbf{d}}_i \tilde{\mathbf{d}}_i^T \ln(V_t \widehat{W}_t^{-1})) \\ & \leq q_{t-1,i} \ln \frac{1}{1-\alpha} \end{aligned} \quad (46)$$

where the equality is due to the fact that  $V_t$  and  $\widehat{W}_t$  have the same eigenvectors. The inequality follows since  $\ln(V_t \widehat{W}_t^{-1}) \preceq I \ln \frac{1}{1-\alpha}$ , due to the update in Eq.(14b), while  $q_{t-1,i} \tilde{\mathbf{d}}_i \tilde{\mathbf{d}}_i^T$  is positive semi-definite. Thus Lemma 5 gives the result.

The bound  $\textcircled{3}$  can be expressed as:

$$\textcircled{3} = \text{Tr}((-q_{t,i} \tilde{\mathbf{d}}_i \tilde{\mathbf{d}}_i^T + q_{t-1,i} \tilde{\mathbf{d}}_i \tilde{\mathbf{d}}_i^T) \ln V_t) \leq 0 \quad (47)$$

Here, the inequality follows since  $\ln V_t \preceq 0$  and  $(-q_{t,i} \tilde{\mathbf{d}}_i \tilde{\mathbf{d}}_i^T + q_{t-1,i} \tilde{\mathbf{d}}_i \tilde{\mathbf{d}}_i^T)$  is positive semi-definite. Thus, Lemma 5 gives the result.

For (4), we have (4)  $\leq q_{t,i} \ln \frac{1}{1-\alpha}$ , which follows the same argument used to bound the term (2).

Thus,  $\bar{A}$  can be upper bounded as follows:

$$\begin{aligned} \bar{A} &\leq \underbrace{\sum_{i:q_{t,i} \geq q_{t-1,i}} (q_{t,i} - q_{t-1,i}) \ln \frac{n}{\alpha}}_{=D_{TV}(\mathbf{q}_t, \mathbf{q}_{t-1})} \\ &\quad + \underbrace{\left( \sum_{i:q_{t,i} \geq q_{t-1,i}} q_{t-1,i} + \sum_{i:q_{t,i} < q_{t-1,i}} q_{t,i} \right) \ln \frac{1}{1-\alpha}}_{=\|\mathbf{q}_t\|_1 - D_{TV}(\mathbf{q}_t, \mathbf{q}_{t-1})} \end{aligned} \quad (48)$$

Then we telescope the  $\bar{B}$  term, substitute the above inequality for  $\bar{A}$  into Eq.(43), and sum over  $t = 2, \dots, T$  to give:

$$\begin{aligned} &\sum_{t=2}^T \left( -\text{Tr}(Q_t \ln \widehat{W}_t) + \text{Tr}(Q_t \ln V_{t+1}) \right) \\ &\leq m(\mathbf{q}_{1:T}) \ln \frac{n}{\alpha} + \left( \sum_{t=2}^T \|\mathbf{q}_t\|_1 - m(\mathbf{q}_{1:T}) \right) \ln \frac{1}{1-\alpha} - \text{Tr}(Q_1 \ln V_2) \end{aligned} \quad (49)$$

Adding the  $t = 1$  term to the above inequality, we have

$$\begin{aligned} &\sum_{t=1}^T \left( -\text{Tr}(Q_t \ln \widehat{W}_t) + \text{Tr}(Q_t \ln V_{t+1}) \right) \\ &\leq \|\mathbf{q}_1\|_1 \ln(n) + m(\mathbf{q}_{1:T}) \ln \frac{n}{\alpha} + \left( \sum_{t=1}^T \|\mathbf{q}_t\|_1 - m(\mathbf{q}_{1:T}) \right) \ln \frac{1}{1-\alpha} \end{aligned} \quad (50)$$

For the above inequality, we set  $Q_t = Q \in \mathcal{B}_{n-k}^n$  for  $t = r, \dots, s$  and 0 elsewhere, which makes  $\mathbf{q}_t = \mathbf{q} \in \mathcal{B}_{n-k}^n$  for  $t = r, \dots, s$  and 0 elsewhere. If  $r \geq 2$ ,  $m(\mathbf{q}_{1:T}) = 1$ , and  $\|\mathbf{q}_1\|_1 = 0$ . If  $r = 1$ ,  $m(\mathbf{q}_{1:T}) = 0$ , and  $\|\mathbf{q}_1\|_1 = 1$ . Thus,  $m(\mathbf{q}_{1:T}) + \|\mathbf{q}_1\|_1 = 1$ , and the right part can be upper bounded by  $\ln \frac{n}{\alpha} + T \ln \frac{1}{1-\alpha}$ .

The rest of the steps follow exactly the same as in the proof of Theorem 1.  $\square$

### C. Proof of Lemma 3

*Proof.* We first deal with the term  $\text{Tr}(Q_t \ln V_{t+1})$ . According to the update in Eq.(24a), we have

$$\begin{aligned} \text{Tr}(Q_t \ln V_{t+1}) &= \text{Tr} \left( Q_t \ln \left( \frac{\exp(\ln Y_t - \eta C_t)}{\text{Tr}(\exp(\ln Y_t - \eta C_t))} \right) \right) \\ &= \text{Tr} \left( Q_t (\ln Y_t - \eta C_t) \right) - \ln \left( \text{Tr} \left( \exp(\ln Y_t - \eta C_t) \right) \right), \end{aligned} \quad (51)$$

since  $Q_t \in \mathcal{B}_1^n$  and  $\text{Tr}(Q_t) = 1$ .

As a result, we have  $\text{Tr}(Q_t \ln V_{t+1}) - \text{Tr}(Q_t \ln Y_t) = -\eta \text{Tr}(Q_t C_t) - \ln \left( \text{Tr} \left( \exp(\ln Y_t - \eta C_t) \right) \right)$ .

Thus, to prove the inequality in Lemma 3, it is enough to prove the following inequality

$$\eta \text{Tr}(Y_t C_t) - \frac{\eta^2}{2} + \ln \left( \text{Tr} \left( \exp(\ln Y_t - \eta C_t) \right) \right) \leq 0 \quad (52)$$

Before we proceed, we need the following lemmas:

**Lemma 6** (Golden-Thompson inequality). *For any symmetric matrices  $A$  and  $B$ , the following inequality holds:*

$$\text{Tr} \left( \exp(A + B) \right) \leq \text{Tr} \left( \exp(A) \exp(B) \right)$$

**Lemma 7** (Lemma 2.1 in (Tsuda et al., 2005)). *For any symmetric matrix  $A$  such that  $0 \preceq A \preceq I$  and any  $\rho_1, \rho_2 \in \mathbb{R}$ , the following holds:*

$$\exp(A\rho_1 + (I - A)\rho_2) \preceq A \exp(\rho_1) + (I - A) \exp(\rho_2)$$

Then we apply the Golden-Thompson inequality to the term  $\text{Tr} \left( \exp(\ln Y_t - \eta C_t) \right)$ , which gives us the inequality below:

$$\text{Tr} \left( \exp(\ln Y_t - \eta C_t) \right) \leq \text{Tr}(Y_t \exp(-\eta C_t)). \quad (53)$$

For the term  $\exp(-\eta C_t)$ , by applying the Lemma 7 with  $\rho_1 = -\eta$  and  $\rho_2 = 0$ , we will have the following inequality:

$$\exp(-\eta C_t) \preceq I - C_t(1 - \exp(-\eta)). \quad (54)$$

Thus, we will have

$$\text{Tr}(Y_t \exp(-\eta C_t)) \leq 1 - \text{Tr}(Y_t C_t)(1 - \exp(-\eta)), \quad (55)$$

and

$$\text{Tr} \left( \exp(\ln Y_t - \eta C_t) \right) \leq 1 - \text{Tr}(Y_t C_t)(1 - \exp(-\eta)), \quad (56)$$

since  $Y_t \in \mathcal{B}_1^n$  and  $\text{Tr}(Y_t) = 1$ .

Thus, it is enough to prove the following inequality

$$\eta \text{Tr}(Y_t C_t) - \frac{\eta^2}{2} + \ln \left( 1 - \text{Tr}(Y_t C_t)(1 - \exp(-\eta)) \right) \leq 0 \quad (57)$$

Since  $\ln(1 - x) \leq -x$ , we have

$$\ln \left( 1 - \text{Tr}(Y_t C_t)(1 - \exp(-\eta)) \right) \leq -\text{Tr}(Y_t C_t)(1 - \exp(-\eta)). \quad (58)$$

Thus, it suffices to prove the following inequality:

$$(\eta - 1 + \exp(-\eta)) \text{Tr}(Y_t C_t) - \frac{\eta^2}{2} \leq 0 \quad (59)$$

Note that by using convexity of  $\exp(-\eta)$ ,  $\eta - 1 + \exp(-\eta) \geq 0$ .

By applying Lemma 5 with  $A = Y_t$ ,  $B = C_t$ , and  $C = I$ , we have  $\text{Tr}(Y_t C_t) \leq \text{Tr}(Y_t) = 1$ . Thus, when  $\eta \geq 0$ , it is enough to prove the following inequality

$$\eta - 1 + \exp(-\eta) - \frac{\eta^2}{2} \leq 0. \quad (60)$$

This inequality follows from convexity of  $\frac{\eta^2}{2} - \exp(-\eta)$  over  $\eta \geq 0$ .  $\square$

## D. Proof of Theorem 6

*Proof.* First, since  $0 \preceq C_t \preceq I$ , we have  $\max_{i,j} |C_t(i,j)| \leq 1$ .

Before we proceed, we need the following lemma from (Warmuth & Kuzmin, 2006)

**Lemma 8** (Lemma 1 in (Warmuth & Kuzmin, 2006)). *Let  $\max_{i,j} |C_t(i,j)| \leq \frac{r}{2}$ , then for any  $\mathbf{u}_t \in \mathcal{B}_1^n$ , any constants  $a$  and  $b$  such that  $0 \leq a \leq \frac{b}{1+rb}$ , and  $\eta = \frac{2b}{1+rb}$ , we have*

$$a\mathbf{y}_t^T C_t \mathbf{y}_t - b\mathbf{u}_t^T C_t \mathbf{u}_t \leq d(\mathbf{u}_t, \mathbf{y}_t) - d(\mathbf{u}_t, \mathbf{v}_{t+1})$$

Now we apply Lemma 8 under the conditions  $r = 2$ ,  $a = \frac{b}{2b+1}$ ,  $\eta = 2a$ , and  $b = \frac{c}{2}$ .

Recall that  $d(\mathbf{u}_t, \mathbf{y}_t) - d(\mathbf{u}_t, \mathbf{v}_{t+1}) = \sum_i u_{t,i} \ln \left( \frac{v_{t+1,i}}{y_{t,i}} \right)$ . Combining this with the inequality in Lemma 8 and the fact that  $\|\mathbf{u}_t\|_1 = 1$ , we have

$$a \|\mathbf{u}_t\|_1 \mathbf{y}_t^T C_t \mathbf{y}_t - b\mathbf{u}_t^T C_t \mathbf{u}_t \leq \sum_i u_{t,i} \ln \left( \frac{v_{t+1,i}}{y_{t,i}} \right) \quad (61)$$

Note that the above inequality is also true when  $\mathbf{u}_t = 0$ .

Note that the right side of the above inequality is the same as the right part of the Eq.(32) in the proof of Theorem 1.

As a result, we will use the same steps as in the proof of Theorem 1. Then we will set  $\mathbf{u}_t = \mathbf{u} = \operatorname{argmin}_{\mathbf{q} \in \mathcal{B}_1^n} \sum_{t=r}^s \mathbf{q}^T C_t \mathbf{q}$  for  $t = r, \dots, s$ , and 0 elsewhere.

Summing from  $t = 1$  up to  $T$ , gives the following inequality:

$$a \left[ \sum_{t=r}^s \mathbf{y}_t^T C_t \mathbf{y}_t \right] - b \left[ \min_{\mathbf{u} \in \mathcal{B}_1^n} \sum_{t=r}^s \mathbf{u}^T C_t \mathbf{u} \right] \leq \ln \frac{n}{\alpha} + T \ln \frac{1}{1-\alpha} \quad (62)$$

Since  $\alpha = 1/(T+1)$ ,  $T \ln \frac{1}{1-\alpha} \leq 1$ . Then the above inequality becomes

$$a \left[ \sum_{t=r}^s \mathbf{y}_t^T C_t \mathbf{y}_t \right] - b \left[ \min_{\mathbf{u} \in \mathcal{B}_1^n} \sum_{t=r}^s \mathbf{u}^T C_t \mathbf{u} \right] \leq \ln((1+T)n) + 1 \quad (63)$$

Plugging in the expressions of  $a = c/(2c+2)$ ,  $b = c/2$ ,

and  $c = \frac{\sqrt{2 \ln((1+T)n) + 2}}{\sqrt{L}}$  we will have

$$\begin{aligned} & \sum_{t=r}^s \mathbf{y}_t^T C_t \mathbf{y}_t - \min_{\mathbf{u} \in \mathcal{B}_1^n} \sum_{t=r}^s \mathbf{u}^T C_t \mathbf{u} \\ & \leq 2 \left[ \min_{\mathbf{u} \in \mathcal{B}_1^n} \mathbf{u}^T C_t \mathbf{u} \right] + 2 \frac{c+1}{c} (\ln((1+T)n) + 1) \\ & \leq cL + 2 \frac{c+1}{c} (\ln((1+T)n) + 1) \\ & = 2\sqrt{2L} (\ln((1+T)n) + 1) + 2 \ln((1+T)n) \end{aligned} \quad (64)$$

Since the inequality holds for any  $1 \leq r \leq s \leq T$ , the proof is concluded by maximizing over  $[r, s]$  on the left.  $\square$
